# Supplementary material for: Different theta frameworks coexist in the rat hippocampus and are coordinated during memory-guided and novelty tasks
Source: eLife journal article supplement (doi:10.7554/elife.57313), 2020-07-20
Supplement: supp [file elife-57313-supp-v2.zip]

Archive with 10 entries (10 files):
- elife_poa_e57313_Figure_1_figure_supplement_1.pdf
- elife_poa_e57313_Figure_1_figure_supplement_2.pdf
- elife_poa_e57313_Figure_1_figure_supplement_3.pdf
- elife_poa_e57313_Figure_2_figure_supplement_1.pdf
- elife_poa_e57313_Figure_3_figure_supplement_1.pdf
- elife_poa_e57313_Figure_3_figure_supplement_2.pdf
- elife_poa_e57313_Figure_5_figure_supplement_1.pdf
- elife_poa_e57313_Figure_6_figure_supplement_1.pdf
- elife_poa_e57313_Figure_6_figure_supplement_2.pdf
- elife_poa_e57313_Transparent_Reporting_File.docx
