# Supplementary figures and images for: Different theta frameworks coexist in the rat hippocampus and are coordinated during memory-guided and novelty tasks
Source: eLife journal article supplement (doi:10.7554/elife.57313), 2020-07-20

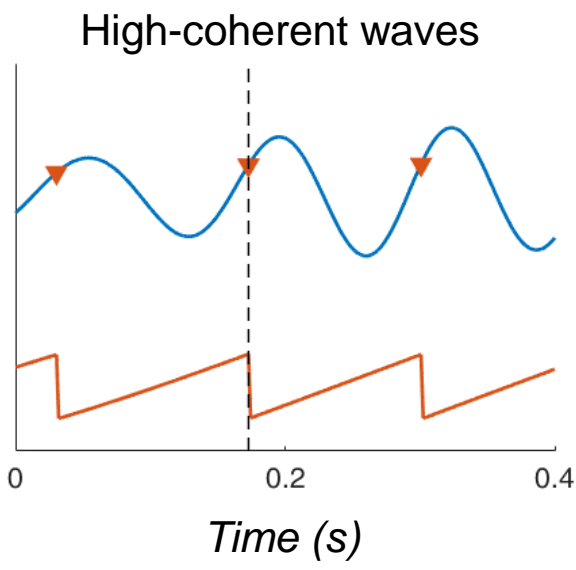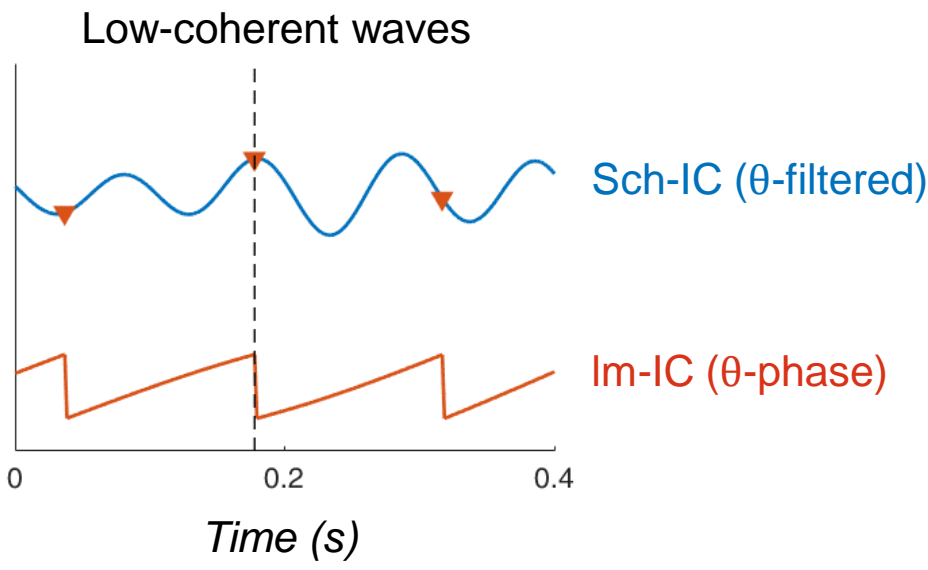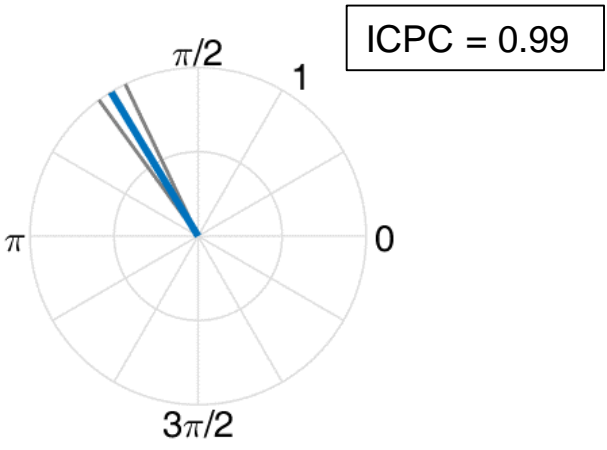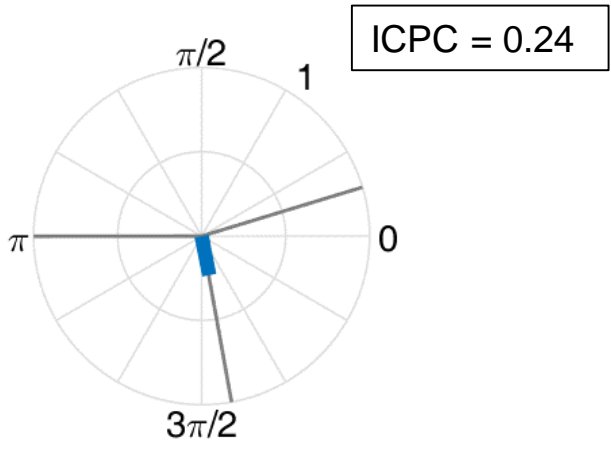

Supplement: supp [file elife-57313-supp-v1.zip]

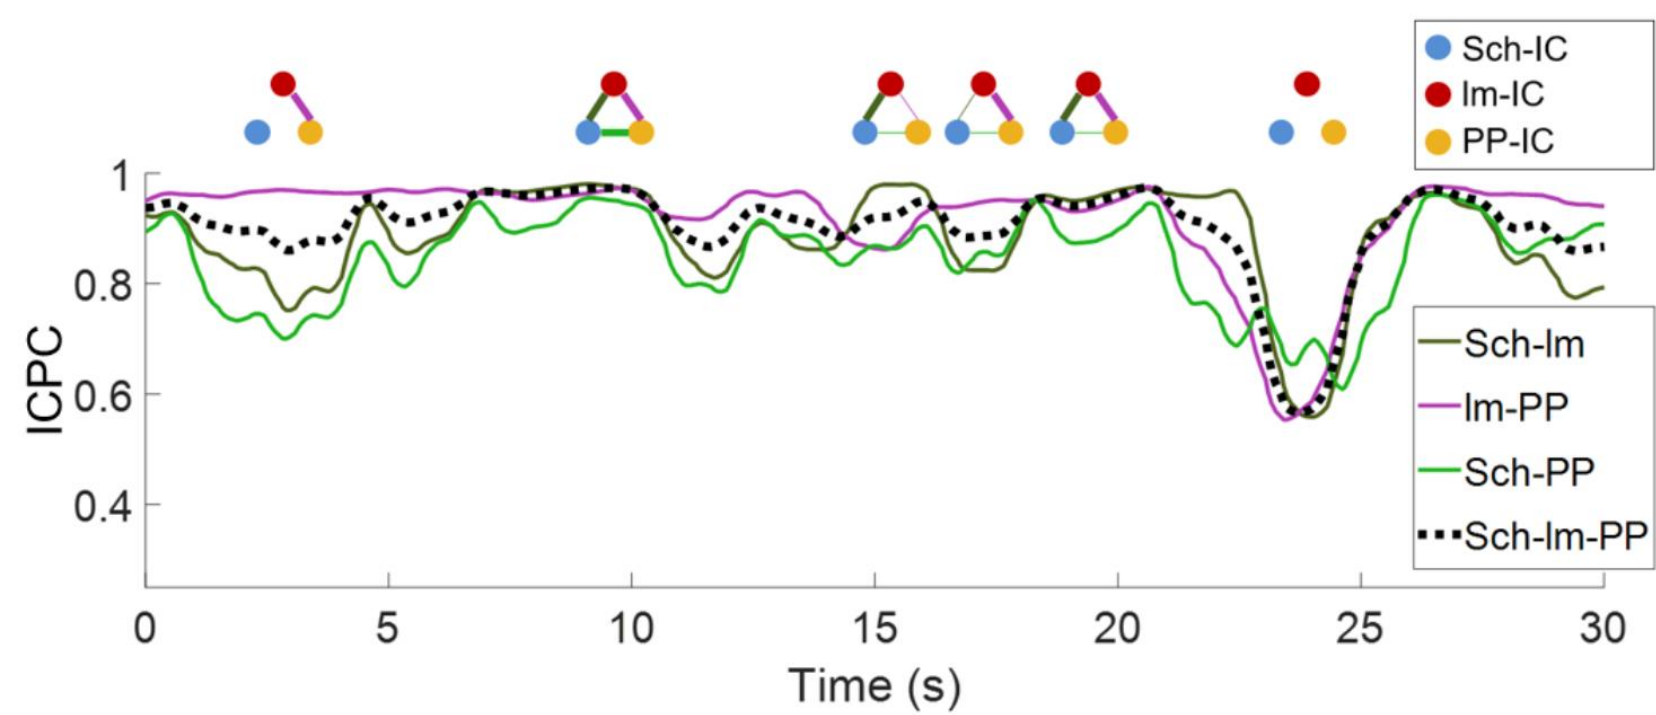

Supplement: supp [file elife-57313-supp-v1.zip]

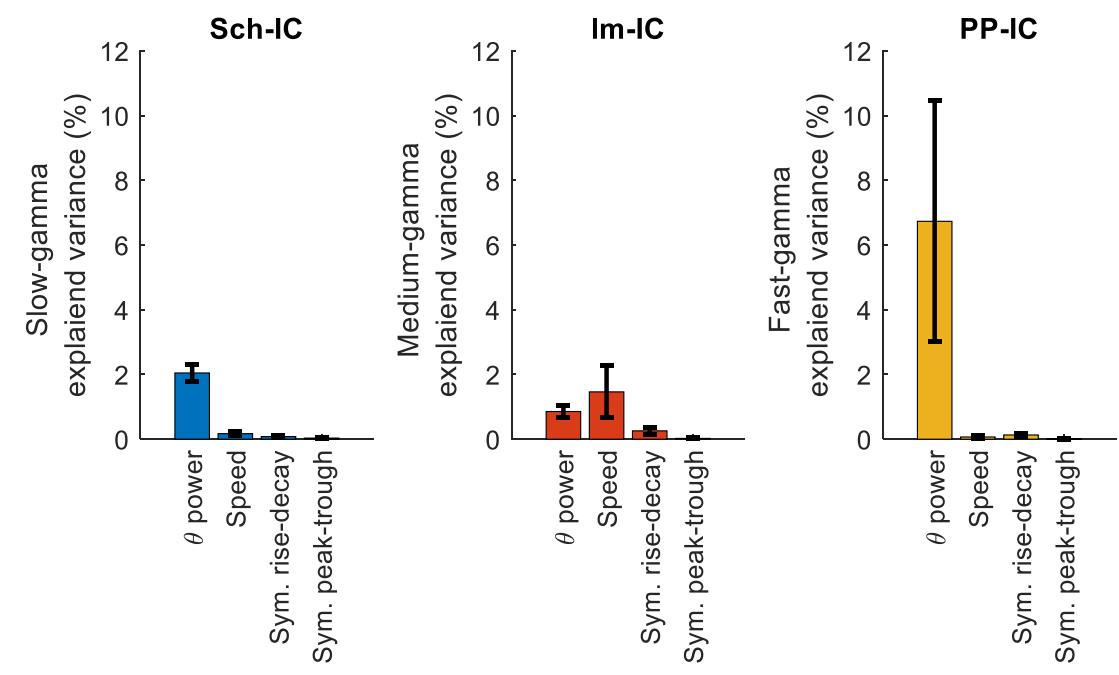

Supplement: supp [file elife-57313-supp-v1.zip]

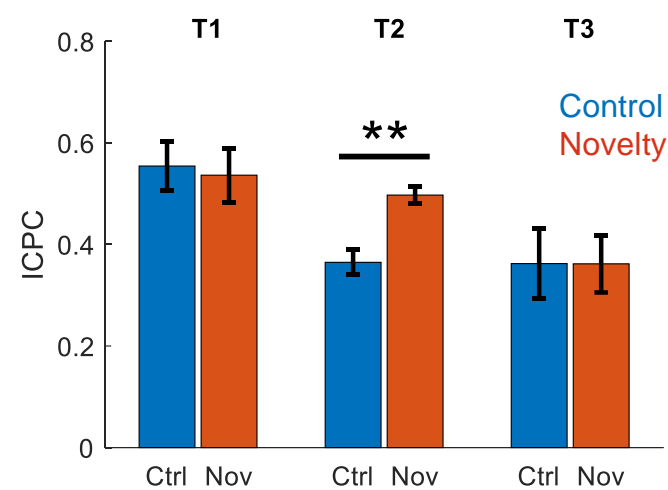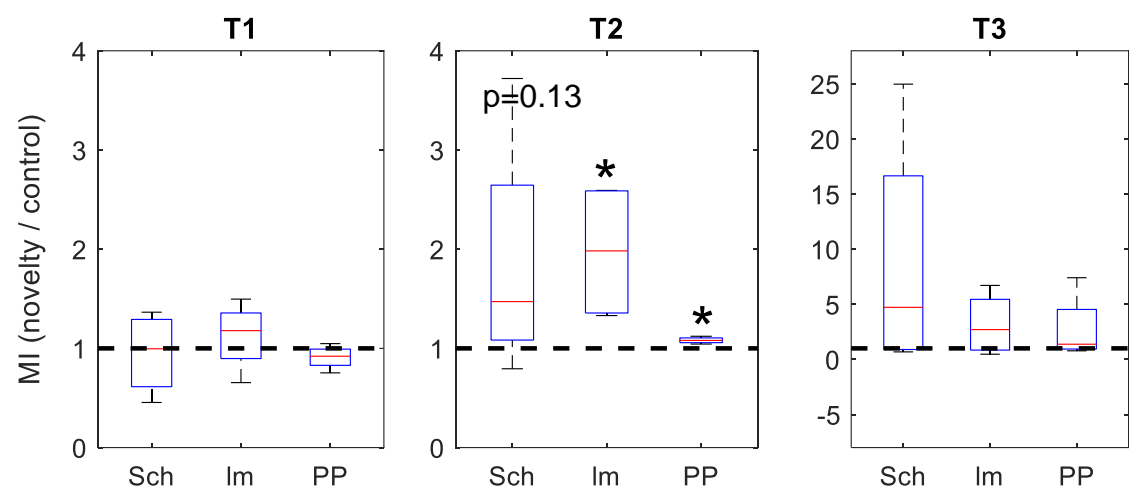

Supplement: supp [file elife-57313-supp-v1.zip]

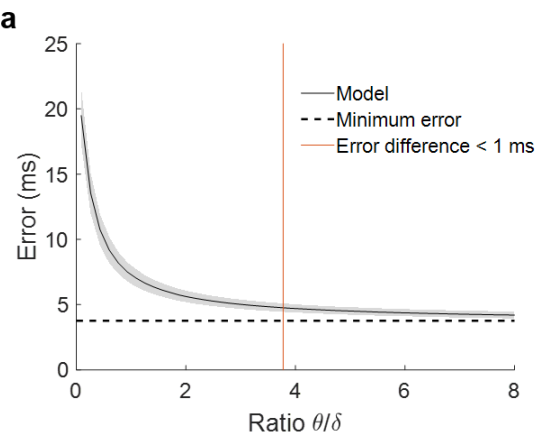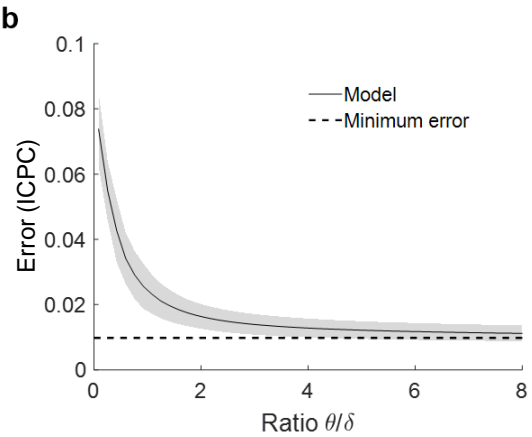

Supplement: supp [file elife-57313-supp-v1.zip]

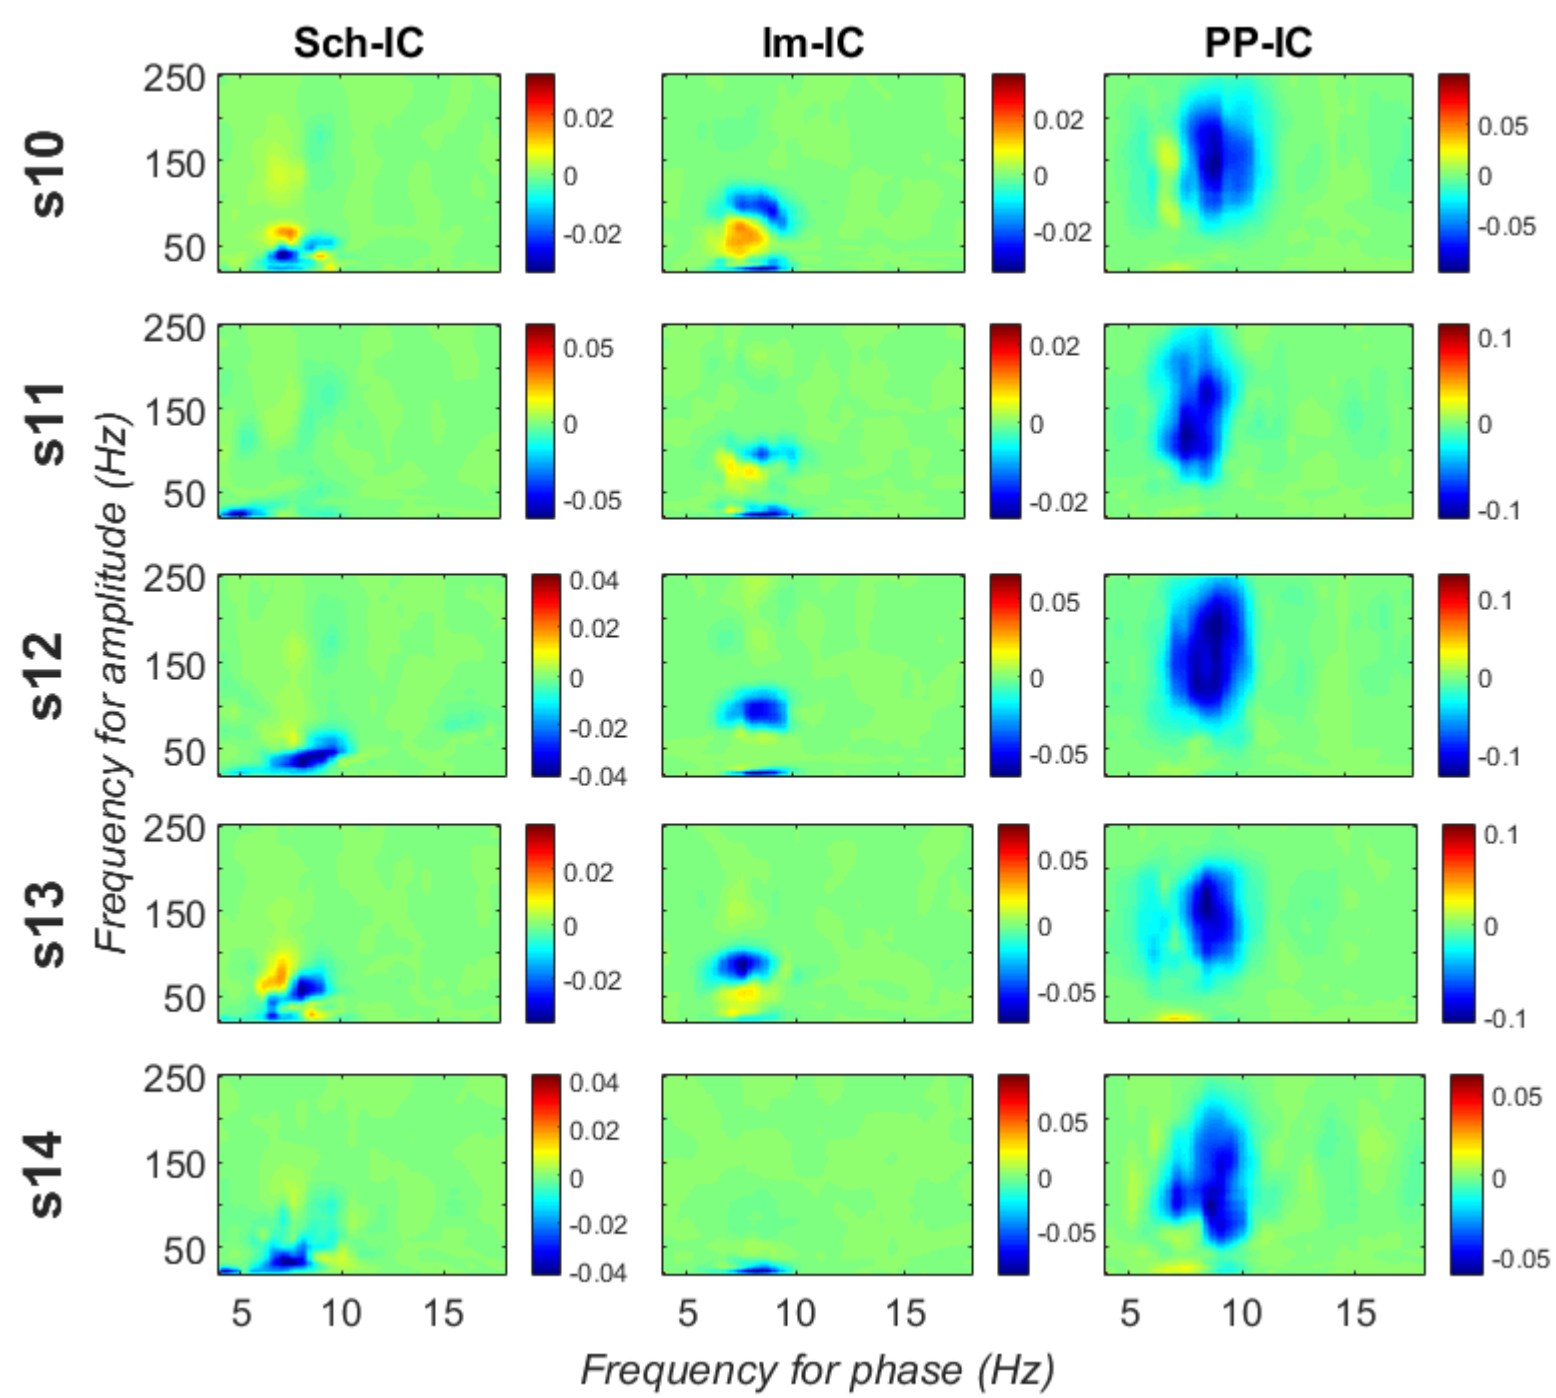

Supplement: supp [file elife-57313-supp-v1.zip]

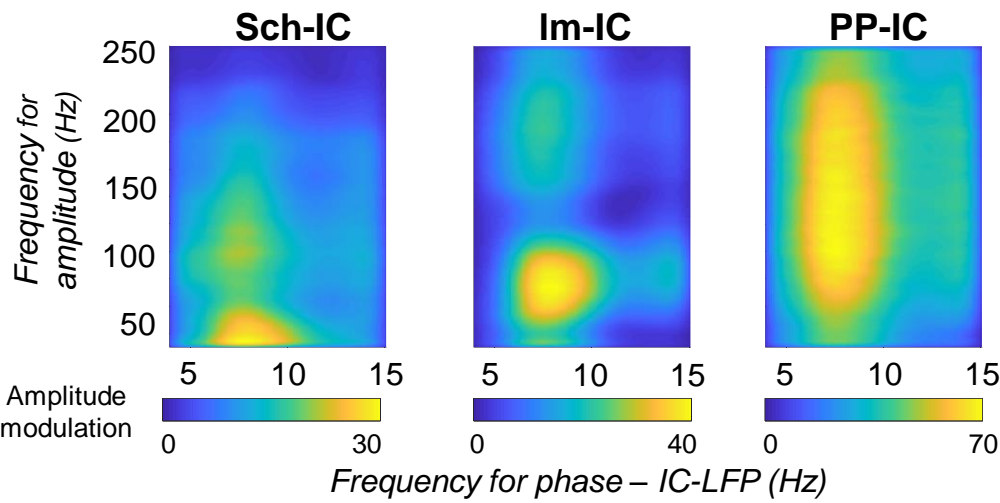

Supplement: supp [file elife-57313-supp-v1.zip]

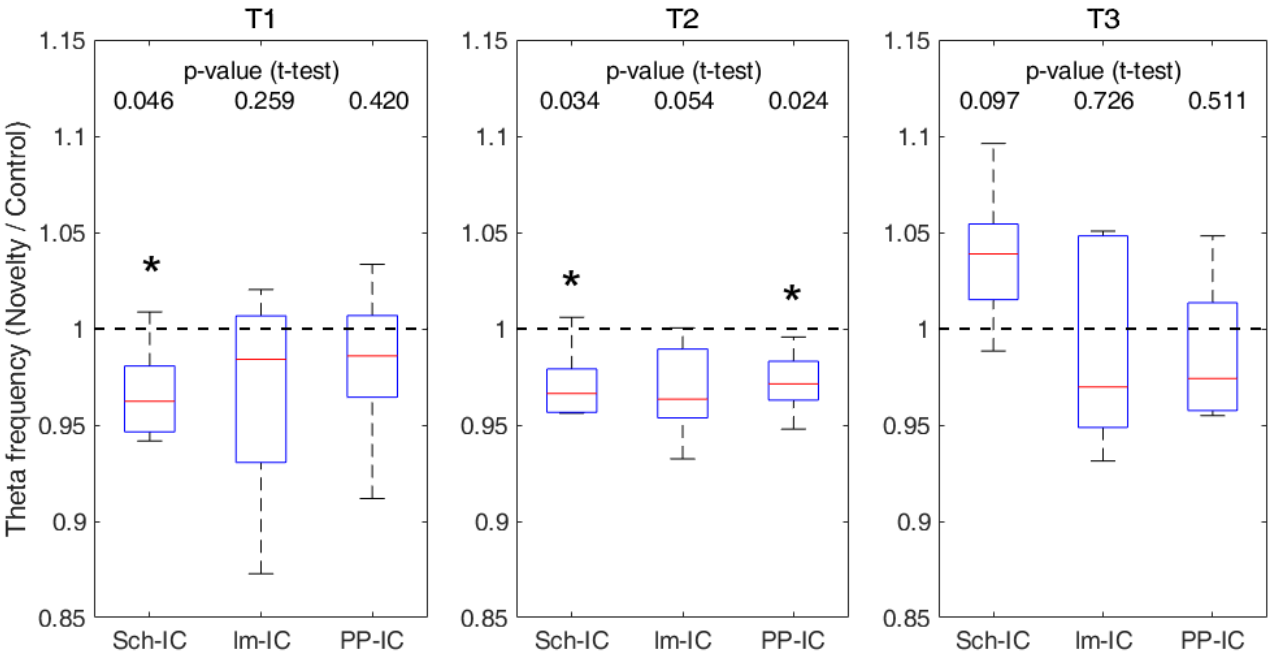

Supplement: supp [file elife-57313-supp-v1.zip]

**a** Decomposition of independent components with ICA

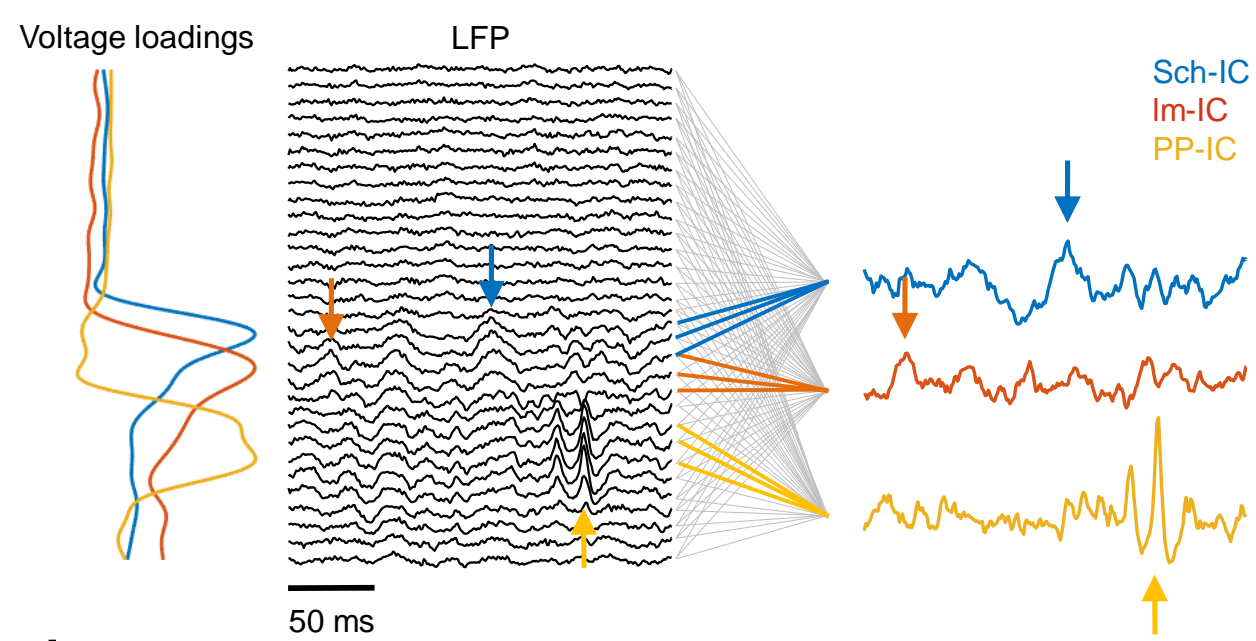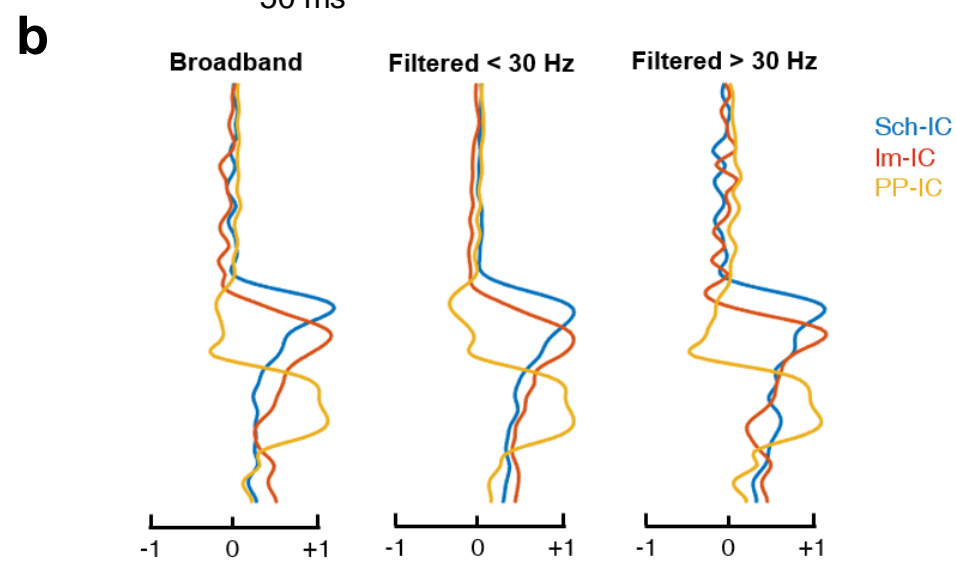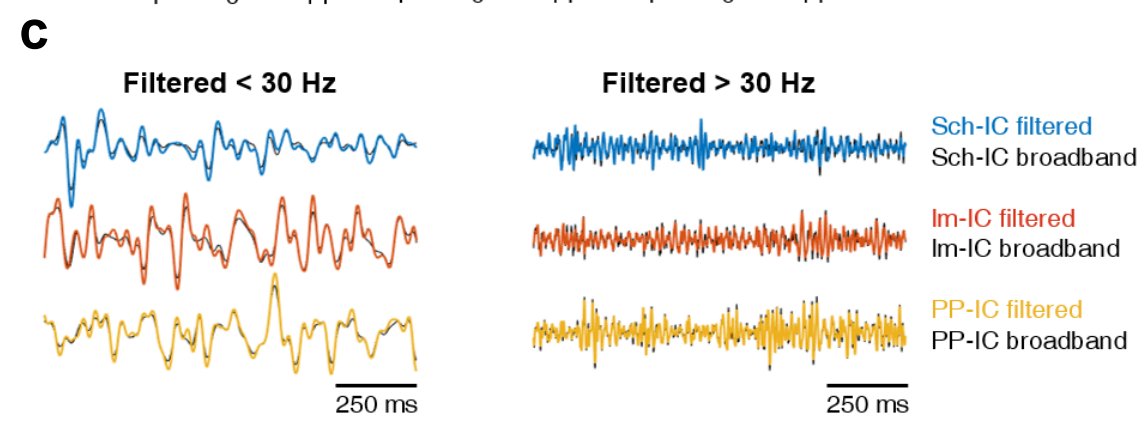

Supplement: supp [file elife-57313-supp-v1.zip]
